# Supplementary material
Source: PubMed Central journal article supplement (PMC3936481)
Supplement: nn405114z_si_001.pdf [file nn405114z_si_001.pdf]

# Supporting Information for: Revealing the Adsorption Mechanisms of Nitroxides on Ultra-Pure, Metallicity-Sorted Carbon Nanotubes

Georgina Ruiz-Soria,<sup>†</sup> Alejandro Pérez Paz,<sup>‡</sup> Markus Sauer,<sup>†</sup> Duncan John Mowbray,<sup>‡</sup> Paolo Lacovig,<sup>¶</sup> Matteo Dalmiglio,<sup>¶</sup> Silvano Lizzit,<sup>¶</sup> Kazuhiro Yanagi,<sup>§</sup> Angel Rubio,<sup>‡</sup> Andrea Goldoni,<sup>¶</sup> Paola Ayala,<sup>\*,†</sup> and Thomas Pichler<sup>\*,†</sup>

<sup>†</sup> Faculty of Physics, University of Vienna, Strudlhofgasse 4, A-1090 Vienna, Austria

<sup>‡</sup> Nano-Bio Spectroscopy Group and ETSF Scientific Development Centre, Departamento de Física de Materiales, Centro de Física de Materiales CSIC-UPV/EHU-MPC and DIPC, Universidad del País Vasco UPV/EHU, E-20018 San Sebastián, Spain

<sup>¶</sup> Sincrotrone Trieste, s.s. 14 km 163.5, 34149 Trieste, Italy

<sup>§</sup> Department of Physics, Tokyo Metropolitan University, Hachioji, 192-0397 Tokyo, Japan

## Contents

|          |                                                 |           |
|----------|-------------------------------------------------|-----------|
| <b>1</b> | <b>Samples</b>                                  | <b>S1</b> |
| <b>2</b> | <b>Simulated C 1s Spectra</b>                   | <b>S2</b> |
| 2.1      | Isolated Gas Phase Species . . . . .            | S2        |
| 2.2      | Oxygen on SWCNTs . . . . .                      | S2        |
| <b>3</b> | <b>Calculated Geometries and Total Energies</b> | <b>S3</b> |
| 3.1      | Isolated Gas Phase Species . . . . .            | S3        |
| 3.2      | NO <sub>2</sub> +SWCNTs . . . . .               | S5        |
| 3.3      | O+SWCNTs . . . . .                              | S8        |

## 1. Samples

The single-walled carbon nanotubes (SWCNTs) used in our experiments are material in which semiconducting and metallic separation has been achieved, allowing the formation of high-purity networks.<sup>S1</sup> The overall morphology of these films can be observed in the scanning electron microscopy (SEM) micrograph shown in Fig. S1. This image corresponds to the semiconducting sample but there is no observable difference between both types of films with this imaging technique.

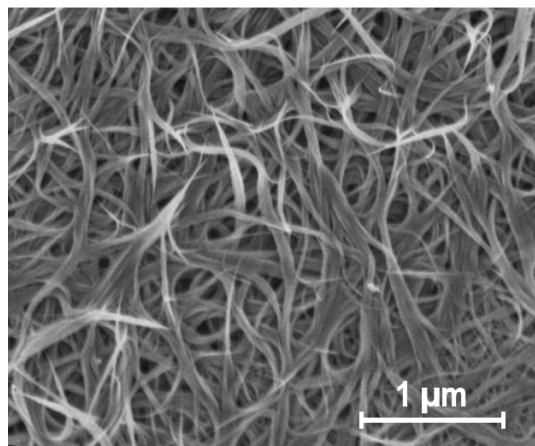

**Figure S1.** Scanning Electron Microscopy micrograph at intermediate magnification showing the overall morphology of the nanotube films used in the experiments.

Both types of samples were purified and separated into metallic and semiconducting tubes. They were then deposited on sapphire substrates.<sup>S2,S3</sup> In our previous studies on these kinds of samples, we have shown that the SWCNT buckypapers have less than 1 wt% of processing residuals with X-ray photoelectron spectroscopy (XPS), with negligible residual magnetic metal impurity content. Typically, in these samples the remaining amount of surfactants, such as deoxycholate sodium salt, is below the detection limit of XPS and Fourier transform infrared spectroscopy (FT-IR). The G/D ratio in the Raman spectra of these SWCNT samples is typically around 20 from previous studies.<sup>S2,S3</sup> As seen in the optical absorption spectra of these high purity samples (metal and semiconducting) shown in Fig. S2, no bands associated with the other conduction type are identified in either spectra.

Other spectroscopy studies that prove the high purity of the samples can be done with photoemission and X-ray absorption spectroscopy, and in particular valence band photoemission. These studies would be useless in the presence of impurities using a macroscopic sample, as can be understood from some previous publications.<sup>S4-S7</sup>

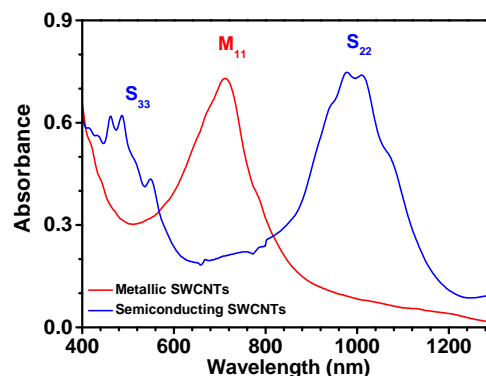

**Figure S2.** Optical absorption spectra of the high purity samples: metallic (red) and semiconducting (blue).

Additionally, our previous reports on these type of nanotube networks have confirmed their ultra-high purity with other techniques. For instance, it is now understood how the presence of semiconducting species affects the conduction mechanisms in SWCNT-networks. The transport mechanisms systematically change as the

relative content of metallic to semiconducting SWCNTs is varied and quantum transport was achieved only in macroscopic networks of pure metallic SWCNTs.<sup>S2</sup>

## 2. Simulated C 1s Spectra

**Table S1. Carbon Species, Isolated Gas Phase Molecules, and Functional Groups Studied.**

| C Species | Molecule         | Formula                                       | Group               |
|-----------|------------------|-----------------------------------------------|---------------------|
| O=C=O     | carbon dioxide   | CO <sub>2</sub>                               |                     |
| C≡O       | carbon monoxide  | CO                                            |                     |
| C=O       | ethenone         | CH <sub>2</sub> CO                            | ketene              |
|           | formaldehyde     | CH <sub>2</sub> O                             | aldehyde / carbonyl |
|           | acetyl radical   | CH <sub>3</sub> CO                            | acetyl              |
|           | acetone          | (CH <sub>3</sub> ) <sub>2</sub> CO            | ketone / carbonyl   |
| C-O       | phenol           | C <sub>6</sub> H <sub>5</sub> OH              | hydroxyl            |
|           | ethylene oxide   | C <sub>2</sub> H <sub>4</sub> O               | epoxide             |
| C-N       | nitrobenzene     | C <sub>6</sub> H <sub>5</sub> NO <sub>2</sub> | nitro               |
|           | pyridine-N-oxide | C <sub>5</sub> H <sub>5</sub> NO              | amine oxide         |
|           | pyridine         | C <sub>5</sub> H <sub>5</sub> N               | pyridyl             |

**2.1. Isolated Gas Phase Species.** Core-level shifts provide an electronic “fingerprint” of the local chemical environment of an atomic species. This is due to the high degree of localization of these nearly-atomic levels, such as the C 1s. For this reason, simulated C 1s spectra for molecular species may be used to obtain a “blueprint” of the expected core-level shifts for various atomic species (C≡O, C=O, C-O, C-N) within representative functional groups (ketene, carbonyl, acetyl, hydroxyl, epoxide, nitro, amine oxide, pyridyl, etc.). Thus, to obtain further insight into the possible functional groups that may be present in the experimental SWCNT samples we have simulated the C 1s spectra for the representative molecules listed in Table S1 in gas phase.

To this end, we have employed more than 6 Å of vacuum and non-periodic boundary conditions in all directions. In this way, we ensure a common vacuum-level reference between the all-electron C 1s eigenenergies calculated for the various molecular species in Table S1. The C 1s spectra is then simulated by employing a Lorentzian broadening with an inverse lifetime of 0.27 eV, and aligning the calculated and experimental C 1s levels of the C-C species in acetone, as shown in Fig. S3.

Comparison of the simulated C 1s spectra in Fig. S3 with the high binding energy feature in the XPS C 1s spectra for SWCNTs dosed with NO<sub>2</sub> clearly indicates this feature is due to a C=O species, as both C-O and C-N shifts are too small. Further, the core-level shift arising from a ketene group yields the largest shift, and is well separated from the carbonyl and acetyl groups. This provides further verification that this feature observed in the XPS C 1s spectra is due to a C=O species in a ketene group on a SWCNT. Furthermore, the good matching shown in Fig. S3 between calculated and experimental XPS spectra for acetone (red squares)<sup>S8</sup> validates our computational approach.

**2.2. Oxygen on SWCNTs.** To further justify our assignment of the feature observed in the XPS C 1s spectra at high binding energy to the C=O species of a ketene group, we have performed further calculations for the C=O species of a carbonyl group and C-O species of epoxide and chemisorbed O<sub>2</sub>. Since core states are highly localized, we can investigate the effect of several functional groups within the same calculation. In this way, we can ensure a common reference between calculations. The optimized geometries, C 1s levels, and simulated spectra for a carbonyl group adsorbed on a carbene site of a monovacancy, an epoxide group

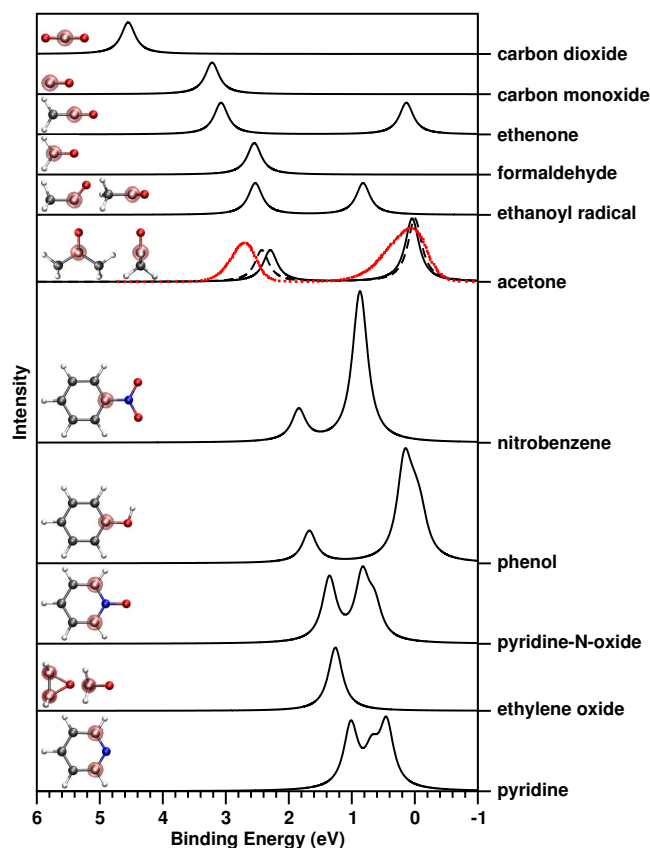

**Figure S3.** Simulated C 1s core-level shifts in eV relative to the C 1s level of the C-C species in acetone for various molecular species. Schematics of each molecule and isosurfaces ( $0.11 e/\text{\AA}^3/2$ ) of the most strongly bound C 1s level are shown as insets. H, C, N, and O atoms are depicted as white, gray, blue, and red spheres, respectively. For acetone, simulated C 1s core-level shifts for the experimental geometry (---) and XPS C 1s measurements (■) are also provided.

adsorbed on a pentagon adjacent to a monovacancy, and an O<sub>2</sub> molecule adsorbed on a semiconducting (10,0) and metallic (6,6) SWCNT are shown in Fig. S4. For both types of SWCNT, we find the C=O species of a carbonyl group and C-O species are at too weak binding energy to give rise to the experimentally observed feature. However, it should be noted that the presence of carboxyl and epoxide groups in the experimental spectra cannot be ruled out as their signals may appear in the region between the main and ketene peaks.

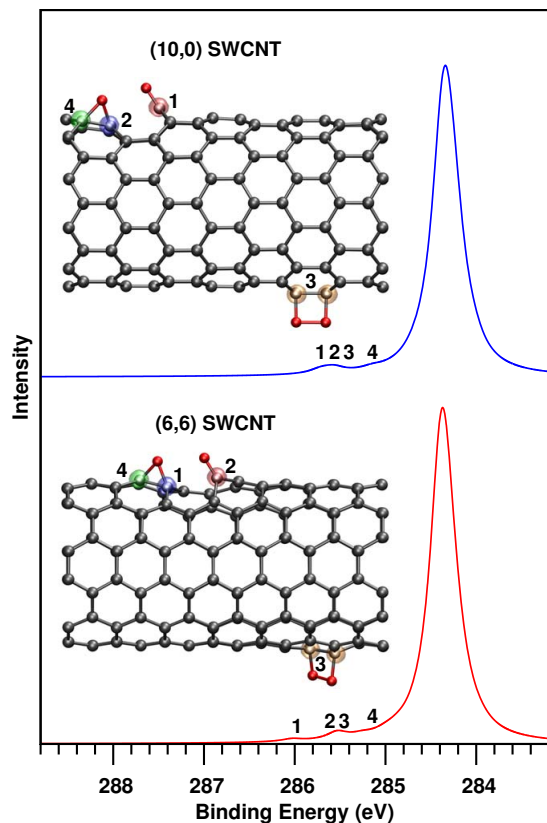

**Figure S4.** Simulated C 1s spectra for defective semiconducting (10,0) (top) and metallic (6,6) (bottom) SWCNTs with adsorbed molecular oxygen (orange), epoxide (blue and green), and carbonyl (red) groups. Schematics of each system and isosurfaces ( $0.11 e/\text{\AA}^{3/2}$ ) of the four most strongly bound C 1s levels are shown as insets. C and O atoms are depicted as gray and red spheres, respectively.

### 3. Calculated Geometries and Total Energies

All geometries were optimized within the local density approximation (LDA)<sup>S9</sup> until a maximum force less than 0.05 eV/ $\text{\AA}$  was obtained. The total energy for the relaxed structure is given in Hartrees. All coordinates (provided in xyz format below) and cell dimensions are given in  $\text{\AA}$ . For the acetone molecule, we also provide the experimental geometry and its corresponding LDA energy in Table S8.

#### 3.1. Isolated Gas Phase Species.

**Table S2. Coordinates in  $\text{\AA}$  of carbon dioxide**  
 $E = -188.4210 \text{ Ha}$

|   |                                        |          |          |
|---|----------------------------------------|----------|----------|
| 3 | carbon dioxide cell=[12.8, 12.8, 14.4] |          |          |
| C | 6.400000                               | 6.400000 | 7.200000 |
| O | 6.400000                               | 6.400000 | 8.376975 |
| O | 6.400000                               | 6.400000 | 6.023025 |

**Table S3. Coordinates in  $\text{\AA}$  of carbon monoxide**  
 $E = -113.0620 \text{ Ha}$

|   |                                         |          |          |
|---|-----------------------------------------|----------|----------|
| 2 | carbon monoxide cell=[12.8, 12.8, 13.6] |          |          |
| O | 6.400000                                | 6.400000 | 7.339014 |
| C | 6.400000                                | 6.400000 | 6.205357 |

**Table S4. Coordinates in  $\text{\AA}$  of ethenone**  
 $E = -152.0299 \text{ Ha}$

|   |                                  |          |          |
|---|----------------------------------|----------|----------|
| 5 | ethenone cell=[14.4, 15.2, 12.8] |          |          |
| C | 7.200000                         | 6.629969 | 6.400000 |
| O | 7.200000                         | 9.109202 | 6.400000 |
| H | 8.145708                         | 6.091162 | 6.400000 |
| H | 6.254292                         | 6.091162 | 6.400000 |
| C | 7.200000                         | 7.937511 | 6.400000 |

**Table S5. Coordinates in  $\text{\AA}$  of formaldehyde**  
 $E = -114.2274 \text{ Ha}$

|   |                                      |          |          |
|---|--------------------------------------|----------|----------|
| 4 | formaldehyde cell=[14.4, 14.4, 12.8] |          |          |
| C | 7.200000                             | 6.886825 | 6.400000 |
| O | 7.200000                             | 8.099027 | 6.400000 |
| H | 8.153556                             | 6.298014 | 6.400000 |
| H | 6.246445                             | 6.298014 | 6.400000 |

**Table S6. Coordinates in  $\text{\AA}$  of acetyl radical**  
 $E = -152.5804 \text{ Ha}$

|   |                                        |          |          |
|---|----------------------------------------|----------|----------|
| 6 | acetyl radical cell=[14.4, 13.6, 15.2] |          |          |
| O | 7.186157                               | 6.658713 | 9.023855 |
| C | 7.192034                               | 5.998570 | 8.033677 |
| C | 7.191491                               | 6.440020 | 6.620282 |
| H | 7.190326                               | 7.545179 | 6.553618 |
| H | 6.305273                               | 6.023357 | 6.120142 |
| H | 8.075547                               | 6.018981 | 6.121409 |

**Table S7. Coordinates in  $\text{\AA}$  of acetone**  
 $E = -192.2195 \text{ Ha}$

|    |                                 |           |          |
|----|---------------------------------|-----------|----------|
| 10 | acetone cell=[14.4, 16.8, 15.2] |           |          |
| O  | 7.194479                        | 8.388653  | 9.005765 |
| C  | 7.197208                        | 8.395448  | 7.781195 |
| C  | 7.195155                        | 9.660136  | 6.987924 |
| H  | 7.191535                        | 10.535616 | 7.648972 |
| H  | 6.312782                        | 9.689635  | 6.326095 |
| H  | 8.072519                        | 9.697749  | 6.320201 |
| C  | 7.197111                        | 7.139395  | 6.975212 |
| H  | 6.336770                        | 7.128990  | 6.284221 |
| H  | 7.164178                        | 6.254686  | 7.622547 |
| H  | 8.094251                        | 7.099335  | 6.334092 |

**Table S8. Experimental coordinates in  $\text{\AA}$  of acetone**  
 $E = -192.2169 \text{ Ha}$

|    |                                 |           |          |
|----|---------------------------------|-----------|----------|
| 10 | acetone cell=[14.4, 16.8, 15.2] |           |          |
| C  | 7.310400                        | 9.394500  | 6.841100 |
| C  | 7.491400                        | 8.438600  | 8.012200 |
| C  | 7.346500                        | 6.949100  | 7.732400 |
| O  | 7.744600                        | 8.853300  | 9.139900 |
| H  | 6.308700                        | 9.296400  | 6.423600 |
| H  | 8.039000                        | 9.179100  | 6.060100 |
| H  | 7.448600                        | 10.425900 | 7.166300 |
| H  | 6.354100                        | 6.732400  | 7.338200 |
| H  | 8.091300                        | 6.626100  | 7.005600 |
| H  | 7.486600                        | 6.374100  | 8.648000 |

**Table S9. Coordinates in Å of nitrobenzene**  
*E* = -434.6593 Ha

|    |                                      |           |          |
|----|--------------------------------------|-----------|----------|
| 14 | nitrobenzene cell=[17.6, 18.4, 12.8] |           |          |
| C  | 9.423058                             | 11.092330 | 6.400000 |
| C  | 10.196996                            | 9.942475  | 6.400000 |
| C  | 9.587988                             | 8.700289  | 6.400000 |
| C  | 8.206024                             | 8.641131  | 6.400000 |
| C  | 7.417426                             | 9.778537  | 6.400000 |
| C  | 8.037533                             | 11.011347 | 6.400000 |
| N  | 7.560735                             | 7.345418  | 6.400000 |
| O  | 8.294843                             | 6.333715  | 6.400000 |
| O  | 6.311257                             | 7.317178  | 6.400000 |
| H  | 9.913310                             | 12.069673 | 6.400000 |
| H  | 11.288687                            | 10.008559 | 6.400000 |
| H  | 10.149964                            | 7.762432  | 6.400000 |
| H  | 6.332306                             | 9.665477  | 6.400000 |
| H  | 7.442444                             | 11.927286 | 6.400000 |

**Table S10. Coordinates in Å of phenol**  
*E* = -305.6367 Ha

|    |                                |          |           |
|----|--------------------------------|----------|-----------|
| 13 | phenol cell=[17.6, 12.8, 16.8] |          |           |
| H  | 10.321216                      | 6.457342 | 10.546109 |
| C  | 9.781573                       | 6.420628 | 9.596916  |
| C  | 10.476565                      | 6.404482 | 8.400232  |
| H  | 11.567680                      | 6.415058 | 8.399552  |
| C  | 9.778830                       | 6.382661 | 7.202859  |
| H  | 10.319727                      | 6.354709 | 6.253665  |
| C  | 8.396528                       | 6.378600 | 7.194566  |
| H  | 7.830579                       | 6.340255 | 6.259849  |
| C  | 7.708230                       | 6.394464 | 8.397673  |
| C  | 8.396972                       | 6.415458 | 9.600285  |
| H  | 7.843188                       | 6.448025 | 10.545886 |
| O  | 6.328415                       | 6.383233 | 8.320459  |
| H  | 6.033467                       | 6.423246 | 9.267341  |

**Table S11. Coordinates in Å of pyridine-N-oxide**  
*E* = -321.5779 Ha

|    |                                          |           |          |
|----|------------------------------------------|-----------|----------|
| 12 | pyridine-N-oxide cell=[17.6, 16.8, 12.8] |           |          |
| C  | 10.227455                                | 8.422011  | 6.399837 |
| C  | 9.570291                                 | 7.219522  | 6.401303 |
| C  | 8.185029                                 | 7.184543  | 6.401162 |
| C  | 7.505801                                 | 8.392385  | 6.400469 |
| C  | 8.191833                                 | 9.579328  | 6.399165 |
| N  | 9.553038                                 | 9.606006  | 6.398242 |
| O  | 10.183576                                | 10.737416 | 6.396520 |
| H  | 11.311465                                | 8.542908  | 6.400213 |
| H  | 10.157848                                | 6.299433  | 6.404773 |
| H  | 7.645358                                 | 6.237603  | 6.403748 |
| H  | 6.413689                                 | 8.424233  | 6.402278 |
| H  | 7.735051                                 | 10.569441 | 6.398282 |

**Table S12. Coordinates in Å of ethylene oxide**  
*E* = -153.1918 Ha

|   |                                        |          |          |
|---|----------------------------------------|----------|----------|
| 7 | ethylene oxide cell=[15.2, 14.4, 13.6] |          |          |
| C | 6.871610                               | 7.204511 | 6.290753 |
| O | 7.598001                               | 7.232259 | 7.548895 |
| H | 6.338607                               | 6.269248 | 6.085070 |
| H | 6.334459                               | 8.129167 | 6.051221 |
| H | 8.862771                               | 6.269634 | 6.093454 |
| H | 8.865648                               | 8.130823 | 6.059390 |
| C | 8.328846                               | 7.205117 | 6.294901 |

**Table S13. Coordinates in Å of pyridine**  
*E* = -246.3191 Ha

|    |                                  |           |          |
|----|----------------------------------|-----------|----------|
| 11 | pyridine cell=[17.6, 16.8, 12.8] |           |          |
| C  | 10.154700                        | 8.430686  | 6.400000 |
| C  | 9.506548                         | 7.207144  | 6.400000 |
| C  | 8.123921                         | 7.196973  | 6.400000 |
| C  | 7.443965                         | 8.403151  | 6.400000 |
| C  | 8.186882                         | 9.574961  | 6.400000 |
| N  | 9.514442                         | 9.595633  | 6.400000 |
| H  | 11.248960                        | 8.479876  | 6.400000 |
| H  | 10.079243                        | 6.276600  | 6.400000 |
| H  | 7.573236                         | 6.251999  | 6.400000 |
| H  | 6.351508                         | 8.439459  | 6.400000 |
| H  | 7.679768                         | 10.548184 | 6.400000 |

3.2. NO<sub>2</sub>+SWCNTs.

Table S14. Coordinates in Å of 10NO<sub>2</sub>+(10,0) SWCNT  
E = -5063.4424 Ha

110

10NO<sub>2</sub>+(10,0)SWCNT cell=[18.4, 18.4, 8.526]

|   |           |           |          |
|---|-----------|-----------|----------|
| C | 13.103979 | 9.239358  | 3.573268 |
| C | 12.858184 | 10.462853 | 2.855687 |
| C | 12.871104 | 10.450255 | 1.426819 |
| C | 12.292948 | 11.533214 | 0.705956 |
| C | 12.291478 | 11.512670 | 3.555317 |
| C | 11.551479 | 12.577802 | 2.844896 |
| C | 11.419439 | 12.391310 | 1.390823 |
| C | 10.322639 | 12.897152 | 0.691189 |
| C | 10.292514 | 12.917153 | 3.543892 |
| C | 9.104972  | 13.052075 | 2.834361 |
| C | 9.085387  | 13.054573 | 1.405698 |
| C | 7.903583  | 12.873994 | 0.704508 |
| C | 7.891812  | 12.866979 | 3.555010 |
| C | 6.791008  | 12.331201 | 2.869306 |
| C | 6.653283  | 12.518747 | 1.415420 |
| C | 5.929910  | 11.433881 | 0.714919 |
| C | 5.955888  | 11.462004 | 3.569839 |
| C | 5.426768  | 10.329695 | 2.850136 |
| C | 5.436346  | 10.345826 | 1.421982 |
| C | 5.244456  | 9.132624  | 0.701441 |
| C | 5.251118  | 9.151334  | 3.549815 |
| C | 5.227259  | 7.852298  | 2.841877 |
| C | 5.432109  | 7.925007  | 1.386090 |
| C | 6.024409  | 6.872238  | 0.684966 |
| C | 6.070211  | 6.856585  | 3.537620 |
| C | 6.958750  | 6.065877  | 2.828040 |
| C | 6.950897  | 6.042896  | 1.401202 |
| C | 8.023970  | 5.519526  | 0.692645 |
| C | 8.066309  | 5.516087  | 3.545262 |
| C | 9.258160  | 5.310363  | 2.854277 |
| C | 9.247580  | 5.105125  | 1.401869 |
| C | 10.464648 | 5.520465  | 0.685522 |
| C | 10.465084 | 5.515347  | 3.550196 |
| C | 11.550324 | 6.082839  | 2.834753 |
| C | 11.534973 | 6.124736  | 1.412806 |
| C | 12.391417 | 6.969922  | 0.711737 |
| C | 12.400292 | 6.948591  | 3.559685 |
| C | 12.968934 | 8.043234  | 2.875397 |
| C | 13.188629 | 7.982102  | 1.422864 |
| C | 13.138934 | 9.283990  | 0.722096 |
| C | 13.132684 | 9.283543  | 7.837702 |
| C | 12.919323 | 10.472471 | 7.137013 |
| C | 13.121943 | 10.544195 | 5.678937 |
| C | 12.272089 | 11.528040 | 4.970708 |
| C | 12.299393 | 11.525403 | 7.820896 |
| C | 11.386826 | 12.348467 | 7.100465 |
| C | 11.402883 | 12.339326 | 5.671041 |
| C | 10.291646 | 12.906606 | 4.951377 |
| C | 10.326883 | 12.898931 | 7.807294 |
| C | 9.095038  | 13.322947 | 7.105793 |

|   |           |           |          |
|---|-----------|-----------|----------|
| C | 9.101634  | 13.091229 | 5.652072 |
| C | 7.900159  | 12.868088 | 4.965212 |
| C | 7.882133  | 12.864411 | 7.817982 |
| C | 6.827448  | 12.306216 | 7.115345 |
| C | 6.818022  | 12.290757 | 5.686636 |
| C | 5.953511  | 11.467949 | 4.976535 |
| C | 5.934792  | 11.436007 | 7.831855 |
| C | 5.387354  | 10.360430 | 7.131935 |
| C | 5.166130  | 10.427797 | 5.676324 |
| C | 5.254975  | 9.129872  | 4.965696 |
| C | 5.245707  | 9.145068  | 7.815926 |
| C | 5.490058  | 7.943472  | 7.094698 |
| C | 5.491330  | 7.961861  | 5.665606 |
| C | 6.077578  | 6.861285  | 4.949240 |
| C | 6.026228  | 6.876282  | 7.800385 |
| C | 6.796761  | 5.829978  | 7.096898 |
| C | 6.934674  | 6.018236  | 5.648983 |
| C | 8.055422  | 5.504585  | 4.965769 |
| C | 8.040330  | 5.504404  | 7.812355 |
| C | 9.237887  | 5.352943  | 7.112836 |
| C | 9.253856  | 5.317288  | 5.690602 |
| C | 10.465774 | 5.510267  | 4.976968 |
| C | 10.455168 | 5.513935  | 7.841034 |
| C | 11.687646 | 5.905013  | 7.127931 |
| C | 11.557244 | 6.061908  | 5.672466 |
| C | 12.381882 | 6.948402  | 4.980064 |
| C | 12.401124 | 6.986174  | 7.832658 |
| C | 12.924725 | 8.057201  | 7.122157 |
| C | 12.907855 | 8.067445  | 5.695989 |
| C | 13.107473 | 9.238725  | 4.984472 |
| N | 9.050969  | 14.991482 | 7.167179 |
| O | 10.127217 | 15.529337 | 7.071566 |
| O | 7.951927  | 15.480055 | 7.251743 |
| N | 12.540348 | 13.941142 | 2.928208 |
| O | 13.721240 | 13.715673 | 3.018993 |
| O | 11.964697 | 14.997316 | 2.843685 |
| N | 14.661701 | 11.136631 | 5.556480 |
| O | 15.529008 | 10.304072 | 5.439924 |
| O | 14.759807 | 12.336267 | 5.630089 |
| N | 12.729488 | 4.571236  | 7.223681 |
| O | 12.187426 | 3.496533  | 7.293900 |
| O | 13.902903 | 4.841264  | 7.174470 |
| N | 14.791341 | 7.433008  | 1.340846 |
| O | 14.923683 | 6.237818  | 1.267897 |
| O | 15.629148 | 8.298544  | 1.397425 |
| N | 9.220716  | 3.390945  | 1.325045 |
| O | 8.145471  | 2.896902  | 1.547391 |
| O | 10.281705 | 2.870663  | 1.094029 |
| N | 5.813488  | 4.429131  | 7.171326 |
| O | 4.673776  | 4.598514  | 6.817428 |
| O | 6.360241  | 3.426187  | 7.552793 |
| N | 3.643512  | 7.304326  | 2.952321 |
| O | 2.800813  | 8.166220  | 2.971389 |
| O | 3.513974  | 6.105191  | 2.962416 |
| N | 3.576094  | 10.893697 | 5.590000 |
| O | 3.386427  | 12.083525 | 5.519854 |
| O | 2.770852  | 9.995532  | 5.652510 |
| N | 5.680725  | 13.873047 | 1.336841 |

O 6.270010 14.924344 1.265335  
 O 4.493972 13.666454 1.399187

**Table S15. Coordinates in Å of 12NO<sub>2</sub>+(6,6) SWCNT  
*E* = -6076.6786 Ha**

132  
 12NO<sub>2</sub>+(6,6)SWCNT cell=[23.2, 23.2, 9.845]

|   |           |           |          |
|---|-----------|-----------|----------|
| C | 13.292307 | 9.133371  | 1.855637 |
| C | 13.074585 | 10.528222 | 1.853716 |
| C | 12.790702 | 11.177528 | 0.623966 |
| C | 11.901133 | 12.277924 | 0.622594 |
| C | 11.323747 | 12.688151 | 1.853863 |
| C | 10.002506 | 13.188566 | 1.854595 |
| C | 9.297836  | 13.271190 | 0.622976 |
| C | 7.902139  | 13.041768 | 0.624096 |
| C | 7.253976  | 12.757461 | 1.854855 |
| C | 6.148872  | 11.876000 | 1.856060 |
| C | 5.730489  | 11.304742 | 0.625870 |
| C | 5.229376  | 9.983384  | 0.627148 |
| C | 5.163176  | 9.279158  | 1.858609 |
| C | 5.397728  | 7.886933  | 1.859530 |
| C | 5.680371  | 7.236031  | 0.628226 |
| C | 6.577626  | 6.143123  | 0.629573 |
| C | 7.147993  | 5.724059  | 1.859627 |
| C | 8.463016  | 5.207268  | 1.859172 |
| C | 9.167857  | 5.131332  | 0.629026 |
| C | 10.563943 | 5.349870  | 0.627964 |
| C | 11.210241 | 5.639718  | 1.858668 |
| C | 12.303952 | 6.532476  | 1.857865 |
| C | 12.730195 | 7.102584  | 0.625631 |
| C | 13.216479 | 8.431812  | 0.625796 |
| C | 13.292292 | 9.133611  | 4.317576 |
| C | 13.075034 | 10.528721 | 4.316932 |
| C | 12.799053 | 11.183371 | 3.084834 |
| C | 11.896914 | 12.274291 | 3.083413 |
| C | 11.323512 | 12.686343 | 4.313469 |
| C | 10.001930 | 13.181580 | 4.312880 |
| C | 9.297924  | 13.259725 | 3.084199 |
| C | 7.900107  | 13.042571 | 3.085436 |
| C | 7.252805  | 12.754233 | 4.316740 |
| C | 6.144598  | 11.877375 | 4.317409 |
| C | 5.724846  | 11.307504 | 3.086416 |
| C | 5.228903  | 9.983868  | 3.088341 |
| C | 5.164614  | 9.279145  | 4.318883 |
| C | 5.399963  | 7.886916  | 4.318640 |
| C | 5.688035  | 7.240427  | 3.089053 |
| C | 6.575956  | 6.139718  | 3.090450 |
| C | 7.148128  | 5.722781  | 4.321380 |
| C | 8.463154  | 5.206461  | 4.320700 |
| C | 9.167246  | 5.121614  | 3.089862 |
| C | 10.563337 | 5.346817  | 3.088639 |
| C | 11.209076 | 5.639055  | 4.318317 |
| C | 12.301544 | 6.533188  | 4.315613 |
| C | 12.719768 | 7.106544  | 3.086656 |
| C | 13.224584 | 8.428017  | 3.087150 |
| C | 13.292546 | 9.133442  | 6.777681 |
| C | 13.074492 | 10.528177 | 6.776227 |
| C | 12.789737 | 11.177066 | 5.546327 |
| C | 11.901076 | 12.276825 | 5.544966 |
| C | 11.323609 | 12.686401 | 6.776402 |

|   |           |           |          |   |           |           |          |
|---|-----------|-----------|----------|---|-----------|-----------|----------|
| C | 10.002267 | 13.181462 | 6.777735 | N | 15.049048 | 5.981796  | 0.615705 |
| C | 9.296733  | 13.266148 | 5.545492 | O | 15.101548 | 4.786956  | 0.703899 |
| C | 7.901023  | 13.033230 | 5.546358 | O | 15.897056 | 6.825981  | 0.501310 |
| C | 7.252951  | 12.754192 | 6.777029 | N | 9.167000  | 2.390463  | 8.000847 |
| C | 6.144612  | 11.877752 | 6.778251 | O | 8.163565  | 1.740460  | 8.100175 |
| C | 5.725395  | 11.306919 | 5.547889 | O | 10.323296 | 2.088857  | 7.892743 |
| C | 5.229698  | 9.983571  | 5.549601 | N | 9.194982  | 2.204326  | 3.078190 |
| C | 5.165988  | 9.279048  | 6.781037 | O | 8.223536  | 1.507620  | 3.173993 |
| C | 5.400171  | 7.887090  | 6.781951 | O | 10.366586 | 1.964656  | 2.974452 |
| C | 5.683626  | 7.236401  | 5.550554 | N | 3.386500  | 5.777684  | 5.540286 |
| C | 6.578817  | 6.141931  | 5.551480 | O | 2.308573  | 6.293995  | 5.644720 |
| C | 7.148381  | 5.723922  | 6.782413 | O | 3.729602  | 4.631280  | 5.434814 |
| C | 8.463524  | 5.209922  | 6.781715 | N | 3.397309  | 5.799753  | 0.615768 |
| C | 9.167451  | 5.129927  | 5.551367 | O | 2.309249  | 6.295365  | 0.715154 |
| C | 10.563328 | 5.347969  | 5.550286 | O | 3.764434  | 4.660665  | 0.512564 |
| C | 11.209144 | 5.641564  | 6.781162 | N | 3.224740  | 12.581400 | 8.000277 |
| C | 12.301990 | 6.534165  | 6.780274 | O | 3.066541  | 13.765349 | 8.098616 |
| C | 12.728482 | 7.103082  | 5.547552 | O | 2.462623  | 11.663671 | 7.858037 |
| C | 13.215440 | 8.432182  | 5.547746 | N | 3.232512  | 12.753292 | 3.076965 |
| C | 13.293491 | 9.133309  | 9.240323 | O | 3.058450  | 13.936165 | 3.144308 |
| C | 13.075812 | 10.528919 | 9.239581 | O | 2.485182  | 11.818574 | 2.972662 |
| C | 12.798373 | 11.182722 | 8.007509 |   |           |           |          |
| C | 11.897601 | 12.274447 | 8.006641 |   |           |           |          |
| C | 11.324384 | 12.688413 | 9.236337 |   |           |           |          |
| C | 10.002807 | 13.187805 | 9.236565 |   |           |           |          |
| C | 9.298300  | 13.258724 | 8.006692 |   |           |           |          |
| C | 7.900684  | 13.042022 | 8.007585 |   |           |           |          |
| C | 7.254151  | 12.756995 | 9.239266 |   |           |           |          |
| C | 6.148967  | 11.876390 | 9.241016 |   |           |           |          |
| C | 5.722796  | 11.309051 | 8.009999 |   |           |           |          |
| C | 5.230936  | 9.983254  | 8.010851 |   |           |           |          |
| C | 5.164540  | 9.278932  | 9.240929 |   |           |           |          |
| C | 5.397543  | 7.886574  | 9.241130 |   |           |           |          |
| C | 5.687847  | 7.240512  | 8.011874 |   |           |           |          |
| C | 6.575974  | 6.140685  | 8.013106 |   |           |           |          |
| C | 7.148527  | 5.725647  | 9.244516 |   |           |           |          |
| C | 8.463490  | 5.211269  | 9.244320 |   |           |           |          |
| C | 9.167812  | 5.124014  | 8.013091 |   |           |           |          |
| C | 10.563901 | 5.351141  | 8.011826 |   |           |           |          |
| C | 11.209830 | 5.641839  | 9.240953 |   |           |           |          |
| C | 12.304011 | 6.533440  | 9.238342 |   |           |           |          |
| C | 12.719912 | 7.107230  | 8.009006 |   |           |           |          |
| C | 13.225009 | 8.428402  | 8.009575 |   |           |           |          |
| N | 9.202342  | 15.843000 | 5.541006 |   |           |           |          |
| O | 10.250542 | 16.423902 | 5.603779 |   |           |           |          |
| O | 8.069974  | 16.220276 | 5.412469 |   |           |           |          |
| N | 9.176678  | 16.015384 | 0.615710 |   |           |           |          |
| O | 10.174037 | 16.674244 | 0.710501 |   |           |           |          |
| O | 8.016048  | 16.306298 | 0.512746 |   |           |           |          |
| N | 15.020743 | 12.630075 | 8.005518 |   |           |           |          |
| O | 16.084033 | 12.081158 | 8.095407 |   |           |           |          |
| O | 14.697305 | 13.783728 | 8.094761 |   |           |           |          |
| N | 15.000170 | 12.613162 | 3.082816 |   |           |           |          |
| O | 16.041642 | 12.023090 | 3.161002 |   |           |           |          |
| O | 14.714885 | 13.776212 | 3.174303 |   |           |           |          |
| N | 15.053593 | 6.023530  | 5.538741 |   |           |           |          |
| O | 15.126992 | 4.830306  | 5.632199 |   |           |           |          |
| O | 15.887538 | 6.884158  | 5.434910 |   |           |           |          |

### 3.3. O+SWCNTs.

**Table S16. Coordinates in Å of O+(10,0) SWCNT ketene group  
E = -6125.6211 Ha**

161

O+(10,0)SWCNT cell=[19.2, 19.2, 17.0520]

|   |           |           |          |
|---|-----------|-----------|----------|
| C | 5.927858  | 10.983826 | 3.522052 |
| C | 5.551819  | 9.815449  | 2.808698 |
| C | 5.550596  | 9.811901  | 1.391866 |
| C | 5.527142  | 8.583964  | 0.680518 |
| C | 5.531837  | 8.591293  | 3.523839 |
| C | 5.912728  | 7.425496  | 2.809601 |
| C | 5.910673  | 7.421525  | 1.395516 |
| C | 6.678827  | 6.465681  | 0.679494 |
| C | 6.685674  | 6.474548  | 3.525670 |
| C | 7.744450  | 5.857713  | 2.809616 |
| C | 7.741491  | 5.854528  | 1.395053 |
| C | 8.947613  | 5.645131  | 0.679913 |
| C | 8.952890  | 5.648872  | 3.523377 |
| C | 10.163867 | 5.830719  | 2.808360 |
| C | 10.161452 | 5.829935  | 1.391199 |
| C | 11.269900 | 6.350270  | 0.674572 |
| C | 11.278112 | 6.346774  | 3.520944 |
| C | 12.209755 | 7.142309  | 2.802878 |
| C | 12.202663 | 7.152776  | 1.382120 |
| C | 12.875064 | 8.178546  | 0.665718 |
| C | 12.898553 | 8.153351  | 3.519972 |
| C | 13.271544 | 9.324687  | 2.806700 |
| C | 13.267335 | 9.339260  | 1.388258 |
| C | 13.294195 | 10.576253 | 0.691970 |
| C | 13.278038 | 10.543230 | 3.532078 |
| C | 12.902101 | 11.714323 | 2.832688 |
| C | 12.924973 | 11.732917 | 1.431124 |
| C | 12.168767 | 12.727082 | 0.750220 |
| C | 12.123329 | 12.674661 | 3.539811 |
| C | 11.059665 | 13.303524 | 2.833147 |
| C | 11.074011 | 13.326641 | 1.431761 |
| C | 9.875269  | 13.522478 | 0.694365 |
| C | 9.847269  | 13.506506 | 3.533225 |
| C | 8.640595  | 13.330127 | 2.809352 |
| C | 8.653744  | 13.327318 | 1.390624 |
| C | 7.552345  | 12.789355 | 0.668131 |
| C | 7.527829  | 12.808338 | 3.522408 |
| C | 6.606326  | 12.003522 | 2.804656 |
| C | 6.615430  | 11.997438 | 1.383608 |
| C | 5.931327  | 10.974156 | 0.674611 |
| C | 5.925722  | 10.974330 | 7.789543 |
| C | 5.546864  | 9.811025  | 7.070520 |
| C | 5.549795  | 9.815779  | 5.653694 |
| C | 5.531839  | 8.591523  | 4.939111 |
| C | 5.526260  | 8.583996  | 7.783076 |
| C | 5.911457  | 7.421888  | 7.067726 |
| C | 5.913729  | 7.426363  | 5.653822 |
| C | 6.686462  | 6.474989  | 4.938281 |
| C | 6.680397  | 6.466587  | 7.783216 |
| C | 7.742887  | 5.854995  | 7.067909 |

|   |           |           |           |
|---|-----------|-----------|-----------|
| C | 7.745553  | 5.858140  | 5.653574  |
| C | 8.953066  | 5.648642  | 4.939097  |
| C | 8.948815  | 5.642618  | 7.783193  |
| C | 10.162505 | 5.823984  | 7.070629  |
| C | 10.164617 | 5.828317  | 5.653251  |
| C | 11.278322 | 6.344432  | 4.940068  |
| C | 11.273511 | 6.340353  | 7.788179  |
| C | 12.205227 | 7.141418  | 7.078873  |
| C | 12.211458 | 7.137350  | 5.657170  |
| C | 12.898776 | 8.149527  | 4.939290  |
| C | 12.874032 | 8.168045  | 7.797979  |
| C | 13.250373 | 9.328086  | 7.072079  |
| C | 13.265470 | 9.318691  | 5.657335  |
| C | 13.272612 | 10.541312 | 4.943742  |
| C | 13.255264 | 10.560227 | 7.769273  |
| C | 12.903838 | 11.725988 | 7.048716  |
| C | 12.892021 | 11.711217 | 5.646356  |
| C | 12.122769 | 12.673792 | 4.935991  |
| C | 12.168274 | 12.725880 | 7.754177  |
| C | 11.072019 | 13.307126 | 7.049798  |
| C | 11.059134 | 13.294285 | 5.647272  |
| C | 9.846815  | 13.501048 | 4.944514  |
| C | 9.868695  | 13.484160 | 7.771675  |
| C | 8.649395  | 13.307763 | 7.073426  |
| C | 8.637720  | 13.322382 | 5.658562  |
| C | 7.525390  | 12.807121 | 4.941723  |
| C | 7.548381  | 12.782226 | 7.798892  |
| C | 6.609895  | 11.994939 | 7.080459  |
| C | 6.603452  | 12.002868 | 5.658985  |
| C | 5.925811  | 10.983788 | 4.940961  |
| C | 12.713269 | 8.264622  | 12.049774 |
| C | 13.052311 | 9.437366  | 11.342922 |
| C | 13.163381 | 9.384759  | 9.929570  |
| C | 13.229806 | 10.580008 | 9.182998  |
| C | 12.989012 | 10.681896 | 12.041960 |
| C | 12.959853 | 11.833462 | 11.256221 |
| C | 12.958611 | 11.786886 | 9.860630  |
| C | 12.223335 | 12.789257 | 9.140203  |
| C | 12.517048 | 13.126814 | 11.787236 |
| C | 11.172807 | 13.381562 | 11.262165 |
| C | 11.125178 | 13.368545 | 9.864936  |
| C | 9.891915  | 13.460864 | 9.186428  |
| C | 10.025487 | 13.241168 | 12.044772 |
| C | 8.783110  | 13.126443 | 11.345522 |
| C | 8.716422  | 13.228197 | 9.931260  |
| C | 7.577257  | 12.750030 | 9.217546  |
| C | 7.663383  | 12.637554 | 12.051717 |
| C | 6.672895  | 11.923858 | 11.340816 |
| C | 6.647878  | 11.951966 | 9.923897  |
| C | 5.930900  | 10.962198 | 9.205824  |
| C | 5.942774  | 10.941224 | 12.051946 |
| C | 5.533410  | 9.790966  | 11.333618 |
| C | 5.538902  | 9.798483  | 9.916190  |
| C | 5.520832  | 8.577257  | 9.199808  |
| C | 5.503493  | 8.566539  | 12.048757 |
| C | 5.897929  | 7.407486  | 11.331122 |
| C | 5.903338  | 7.412792  | 9.915245  |
| C | 6.677823  | 6.463438  | 9.198984  |



|   |           |           |           |
|---|-----------|-----------|-----------|
| C | 6.671946  | 6.457200  | 12.049055 |
| C | 7.731534  | 5.841612  | 11.331802 |
| C | 7.735482  | 5.845930  | 9.915545  |
| C | 8.943552  | 5.636419  | 9.200600  |
| C | 8.936735  | 5.623090  | 12.048098 |
| C | 10.146600 | 5.809108  | 11.332649 |
| C | 10.153107 | 5.814615  | 9.915181  |
| C | 11.263097 | 6.341925  | 9.204694  |
| C | 11.240222 | 6.352838  | 12.050595 |
| C | 12.128440 | 7.193783  | 11.338686 |
| C | 12.160275 | 7.171739  | 9.922169  |
| C | 12.838688 | 8.192459  | 9.216510  |
| C | 12.827549 | 8.202331  | 16.298281 |
| C | 13.131649 | 9.390627  | 15.586476 |
| C | 12.993612 | 9.475211  | 14.176398 |
| C | 12.808841 | 10.718801 | 13.478433 |
| C | 13.237488 | 10.587071 | 16.321986 |
| C | 12.802588 | 11.738015 | 15.650705 |
| C | 12.360942 | 11.805653 | 14.301651 |
| C | 12.157633 | 12.714714 | 16.427003 |
| C | 11.094374 | 13.206144 | 15.653148 |
| C | 11.225565 | 12.781914 | 14.302960 |
| C | 10.083985 | 13.066510 | 13.481757 |
| C | 9.892819  | 13.467037 | 16.324836 |
| C | 8.722392  | 13.196340 | 15.589896 |
| C | 8.825440  | 13.072763 | 14.179313 |
| C | 7.675720  | 12.639824 | 13.463682 |
| C | 7.582250  | 12.742809 | 16.300318 |
| C | 6.650790  | 11.947982 | 15.592783 |
| C | 6.679291  | 11.928215 | 14.176429 |
| C | 5.946677  | 10.943479 | 13.465493 |
| C | 5.933582  | 10.960602 | 16.310106 |
| C | 5.541632  | 9.797063  | 15.598543 |
| C | 5.536475  | 9.792041  | 14.181702 |
| C | 5.504109  | 8.567229  | 13.466097 |
| C | 5.520756  | 8.576299  | 16.315788 |
| C | 5.902159  | 7.411897  | 15.599297 |
| C | 5.896860  | 7.407483  | 14.183460 |
| C | 6.672337  | 6.458074  | 13.465777 |
| C | 6.675767  | 6.461909  | 16.315565 |
| C | 7.734783  | 5.847201  | 15.598985 |
| C | 7.732632  | 5.844001  | 14.182607 |
| C | 8.937635  | 5.626141  | 13.465719 |
| C | 8.942273  | 5.639015  | 16.314461 |
| C | 10.150333 | 5.821299  | 15.598423 |
| C | 10.147286 | 5.816144  | 14.181092 |
| C | 11.242116 | 6.358983  | 13.464259 |
| C | 11.257708 | 6.351664  | 16.309966 |
| C | 12.152929 | 7.180070  | 15.591739 |
| C | 12.131832 | 7.203479  | 14.175330 |
| C | 12.713335 | 8.279373  | 13.461236 |
| C | 13.281143 | 13.925435 | 12.480613 |
| O | 13.974502 | 14.600021 | 13.133535 |

**Table S17. Coordinates in Å of O+(6,6) SWCNT ketene group  
E = -6428.1889 Ha**

|                                         |           |           |           |
|-----------------------------------------|-----------|-----------|-----------|
| 169                                     |           |           |           |
| O+(6,6)SWCNT cell=[19.2, 19.2, 17.2287] |           |           |           |
| C                                       | 5.617579  | 8.643176  | 0.550010  |
| C                                       | 5.618507  | 10.056402 | 0.549990  |
| C                                       | 6.936184  | 12.513443 | 0.570897  |
| C                                       | 8.108718  | 13.305196 | 0.585470  |
| C                                       | 10.881305 | 13.528082 | 0.607091  |
| C                                       | 7.034088  | 6.254691  | 0.610188  |
| C                                       | 12.143243 | 12.889940 | 0.618034  |
| C                                       | 13.555741 | 10.499288 | 0.640948  |
| C                                       | 13.548922 | 9.085617  | 0.655877  |
| C                                       | 8.293589  | 5.613265  | 0.657765  |
| C                                       | 12.235628 | 6.624453  | 0.680194  |
| C                                       | 11.065246 | 5.828402  | 0.686187  |
| C                                       | 5.763478  | 7.974303  | 1.791677  |
| C                                       | 5.770165  | 10.755191 | 1.786191  |
| C                                       | 6.453483  | 11.994926 | 1.797987  |
| C                                       | 6.485546  | 6.758940  | 1.817342  |
| C                                       | 8.775436  | 13.539135 | 1.821602  |
| C                                       | 10.185119 | 13.657819 | 1.833449  |
| C                                       | 12.665172 | 12.410918 | 1.850769  |
| C                                       | 13.380606 | 11.190930 | 1.863496  |
| C                                       | 13.362626 | 8.407559  | 1.893254  |
| C                                       | 12.686804 | 7.164825  | 1.909496  |
| C                                       | 8.961753  | 5.505153  | 1.903883  |
| C                                       | 10.370352 | 5.619965  | 1.917784  |
| C                                       | 12.656500 | 12.399367 | 16.621385 |
| C                                       | 6.476553  | 11.978271 | 16.561064 |
| C                                       | 10.201352 | 5.848680  | 6.858396  |
| C                                       | 8.800020  | 5.714220  | 6.864973  |
| C                                       | 6.258863  | 6.732919  | 6.681781  |
| C                                       | 5.560642  | 7.973860  | 6.690930  |
| C                                       | 5.773316  | 10.767173 | 6.720478  |
| C                                       | 6.461481  | 12.002061 | 6.729683  |
| C                                       | 8.785183  | 13.544215 | 6.741987  |
| C                                       | 10.194855 | 13.659739 | 6.754036  |
| C                                       | 13.588238 | 10.529659 | 5.559159  |
| C                                       | 13.552916 | 9.116119  | 5.573878  |
| C                                       | 8.777335  | 13.548427 | 16.588537 |
| C                                       | 12.123540 | 6.724097  | 5.610978  |
| C                                       | 10.918365 | 5.986707  | 5.628576  |
| C                                       | 8.159557  | 5.720823  | 5.589694  |
| C                                       | 6.879352  | 6.302687  | 5.498594  |
| C                                       | 5.464844  | 8.677755  | 5.477497  |
| C                                       | 5.545496  | 10.096550 | 5.485320  |
| C                                       | 6.932856  | 12.523013 | 5.499367  |
| C                                       | 8.113993  | 13.303969 | 5.509162  |
| C                                       | 10.889706 | 13.529133 | 5.527300  |
| C                                       | 12.159664 | 12.906493 | 5.538562  |
| C                                       | 10.186373 | 13.664206 | 16.601345 |
| C                                       | 12.678253 | 12.424724 | 4.310812  |
| C                                       | 13.400268 | 11.208484 | 4.322869  |
| C                                       | 13.352793 | 8.425461  | 4.354514  |
| C                                       | 12.646354 | 7.200967  | 4.374039  |
| C                                       | 10.298670 | 5.696615  | 4.387631  |

|   |           |           |           |   |           |           |           |
|---|-----------|-----------|-----------|---|-----------|-----------|-----------|
| C | 8.894465  | 5.562785  | 4.373207  | C | 12.668387 | 12.409919 | 11.702771 |
| C | 6.404040  | 6.781880  | 4.257540  | C | 10.426178 | 5.562146  | 16.679657 |
| C | 5.677861  | 7.991261  | 4.243195  | C | 13.397833 | 11.198320 | 11.716432 |
| C | 5.747006  | 10.771498 | 4.256099  | C | 13.405345 | 8.414603  | 11.725662 |
| C | 6.448595  | 12.000894 | 4.265352  | C | 12.710528 | 7.181854  | 11.729905 |
| C | 13.554093 | 10.493698 | 15.409027 | C | 10.383181 | 5.687536  | 11.740283 |
| C | 8.780138  | 13.535751 | 4.281701  | C | 8.993323  | 5.601889  | 11.780199 |
| C | 10.189800 | 13.655376 | 4.293268  | C | 6.975728  | 6.688702  | 11.614990 |
| C | 13.565308 | 10.512813 | 3.099535  | C | 6.165001  | 7.870158  | 11.574883 |
| C | 13.542494 | 9.099567  | 3.115738  | C | 5.951522  | 10.688007 | 11.633931 |
| C | 12.184853 | 6.663922  | 3.148337  | C | 6.530370  | 11.969227 | 11.648355 |
| C | 11.003478 | 5.886767  | 3.158137  | C | 8.791338  | 13.574963 | 11.666926 |
| C | 8.234374  | 5.656317  | 3.117066  | C | 9.014490  | 5.444371  | 16.675594 |
| C | 6.970332  | 6.289088  | 3.058648  | C | 10.200188 | 13.682089 | 11.679029 |
| C | 5.542901  | 8.672281  | 3.011985  | C | 13.597254 | 10.525764 | 10.487417 |
| C | 5.563418  | 10.086538 | 3.016145  | C | 13.592251 | 9.113331  | 10.497136 |
| C | 13.558769 | 9.079540  | 15.420875 | C | 12.168931 | 6.738126  | 10.496476 |
| C | 6.929666  | 12.518019 | 3.035530  | C | 10.939840 | 6.053786  | 10.507158 |
| C | 8.108559  | 13.299751 | 3.047687  | C | 8.113506  | 6.089152  | 10.765683 |
| C | 10.884606 | 13.527237 | 3.065952  | C | 5.796356  | 8.598174  | 10.378447 |
| C | 12.151953 | 12.900125 | 3.076538  | C | 5.783038  | 10.011551 | 10.403569 |
| C | 12.269927 | 6.604816  | 15.437545 | C | 6.969750  | 12.523905 | 10.420895 |
| C | 11.113804 | 5.787313  | 15.444258 | C | 8.125267  | 13.333886 | 10.432106 |
| C | 8.332935  | 5.537705  | 15.440326 | C | 6.543543  | 6.716800  | 16.592858 |
| C | 7.078994  | 6.193540  | 15.387705 | C | 10.895214 | 13.538728 | 10.452213 |
| C | 5.698238  | 8.610539  | 15.313306 | C | 12.154599 | 12.897797 | 10.466777 |
| C | 13.372540 | 11.180335 | 16.634250 | C | 12.680324 | 12.422234 | 9.239345  |
| C | 5.692780  | 10.020693 | 15.314178 | C | 13.416029 | 11.215712 | 9.252231  |
| C | 6.953572  | 12.503167 | 15.336319 | C | 13.391280 | 8.448810  | 9.263295  |
| C | 8.114351  | 13.311616 | 15.351896 | C | 12.638963 | 7.260895  | 9.273196  |
| C | 10.885343 | 13.532817 | 15.376347 | C | 10.131007 | 5.972210  | 9.337990  |
| C | 12.141484 | 12.885478 | 15.388075 | C | 8.689973  | 5.963998  | 9.413549  |
| C | 12.658048 | 12.399483 | 14.163231 | C | 5.803528  | 6.534557  | 9.016955  |
| C | 13.376474 | 11.181425 | 14.176187 | C | 5.619648  | 7.965178  | 9.149057  |
| C | 13.397153 | 8.393577  | 14.191311 | C | 5.833234  | 7.940860  | 16.558484 |
| C | 12.738799 | 7.138614  | 14.199087 | C | 5.854079  | 10.730319 | 9.184534  |
| C | 10.468514 | 5.520684  | 14.213877 | C | 6.492110  | 11.995047 | 9.192856  |
| C | 13.380061 | 8.394776  | 16.658411 | C | 8.789191  | 13.565279 | 9.202606  |
| C | 9.058734  | 5.364680  | 14.231895 | C | 10.199482 | 13.670653 | 9.215741  |
| C | 6.593666  | 6.674182  | 14.136086 | C | 13.604710 | 10.538852 | 8.020350  |
| C | 5.931528  | 7.913537  | 14.090061 | C | 13.579535 | 9.128169  | 8.030257  |
| C | 5.890773  | 10.683901 | 14.077336 | C | 12.080560 | 6.780771  | 8.066120  |
| C | 6.509182  | 11.958526 | 14.097195 | C | 10.831551 | 6.118198  | 8.093131  |
| C | 8.785513  | 13.563859 | 14.129486 | C | 8.043805  | 5.892566  | 8.093947  |
| C | 10.194519 | 13.675716 | 14.142003 | C | 6.702926  | 6.221806  | 7.914240  |
| C | 13.573699 | 10.503642 | 12.949160 | C | 5.820990  | 10.725867 | 16.546889 |
| C | 13.580753 | 9.088718  | 12.959437 | C | 5.485258  | 8.672049  | 7.941417  |
| C | 12.259540 | 6.624864  | 12.963117 | C | 5.621167  | 10.075056 | 7.949813  |
| C | 12.722712 | 7.142750  | 16.671060 | C | 6.944357  | 12.528424 | 7.962494  |
| C | 11.100120 | 5.813648  | 12.970075 | C | 8.117962  | 13.318936 | 7.970434  |
| C | 8.374999  | 5.517532  | 13.033911 | C | 10.894040 | 13.531627 | 7.988919  |
| C | 7.158485  | 6.193885  | 12.946072 | C | 12.160987 | 12.904104 | 8.002186  |
| C | 5.855786  | 8.551426  | 12.824449 | C | 12.685248 | 12.430206 | 6.773384  |
| C | 5.791889  | 9.973685  | 12.843498 | C | 13.417562 | 11.220651 | 6.784874  |
| C | 6.974098  | 12.511371 | 12.881252 | C | 13.356958 | 8.445177  | 6.810770  |
| C | 8.124868  | 13.330513 | 12.893103 | C | 12.608197 | 7.245600  | 6.829775  |
| C | 10.891951 | 13.541379 | 12.915424 | C | 5.255903  | 5.615995  | 9.777357  |
| C | 12.147011 | 12.890788 | 12.928761 | O | 4.775702  | 4.786333  | 10.439821 |

**Table S18. Coordinates in Å of 2O@MV (carbonyl and epoxy groups) and O<sub>2</sub>+(10,0) SWCNT  
E = -6313.5479 Ha**

163

O2+2O+(10,0)SWCNT cell=[19.2, 19.2, 17.0520]

|   |           |           |          |
|---|-----------|-----------|----------|
| C | 5.977059  | 10.966378 | 3.526299 |
| C | 5.638430  | 9.785615  | 2.812664 |
| C | 5.590998  | 9.796298  | 1.398293 |
| C | 5.558430  | 8.578348  | 0.680087 |
| C | 5.660947  | 8.553848  | 3.512956 |
| C | 5.907901  | 7.389003  | 2.784930 |
| C | 5.904513  | 7.400801  | 1.386874 |
| C | 6.647883  | 6.419766  | 0.655483 |
| C | 6.443782  | 6.176072  | 3.470605 |
| C | 7.724286  | 5.831610  | 2.786253 |
| C | 7.732059  | 5.836602  | 1.382987 |
| C | 8.944579  | 5.672353  | 0.677173 |
| C | 8.910614  | 5.751707  | 3.511543 |
| C | 10.135989 | 5.904181  | 2.808744 |
| C | 10.149070 | 5.867930  | 1.395207 |
| C | 11.267059 | 6.374225  | 0.677092 |
| C | 11.261247 | 6.396631  | 3.520546 |
| C | 12.211396 | 7.160517  | 2.803903 |
| C | 12.198723 | 7.170128  | 1.381865 |
| C | 12.860683 | 8.206967  | 0.663522 |
| C | 12.915310 | 8.162034  | 3.523108 |
| C | 13.277563 | 9.336677  | 2.810302 |
| C | 13.260080 | 9.357672  | 1.386667 |
| C | 13.319381 | 10.592621 | 0.689038 |
| C | 13.291903 | 10.547987 | 3.535828 |
| C | 12.921228 | 11.726669 | 2.829384 |
| C | 12.962677 | 11.756152 | 1.441942 |
| C | 12.166714 | 12.730504 | 0.752031 |
| C | 12.119135 | 12.675737 | 3.541798 |
| C | 11.047465 | 13.290622 | 2.833626 |
| C | 11.057365 | 13.301938 | 1.431465 |
| C | 9.862888  | 13.501190 | 0.694449 |
| C | 9.839367  | 13.510426 | 3.532565 |
| C | 8.628421  | 13.351115 | 2.808714 |
| C | 8.638226  | 13.335687 | 1.392382 |
| C | 7.535525  | 12.799825 | 0.667607 |
| C | 7.516331  | 12.833183 | 3.525587 |
| C | 6.612186  | 12.008281 | 2.808442 |
| C | 6.608661  | 12.002013 | 1.385756 |
| C | 5.929017  | 10.976082 | 0.678795 |
| C | 5.928757  | 10.981206 | 7.789597 |
| C | 5.590074  | 9.800902  | 7.068206 |
| C | 5.636215  | 9.788574  | 5.654560 |
| C | 5.661594  | 8.555712  | 4.953155 |
| C | 5.563720  | 8.583422  | 7.785495 |
| C | 5.910982  | 7.407056  | 7.078197 |
| C | 5.914296  | 7.393689  | 5.680683 |
| C | 6.447973  | 6.179859  | 4.997086 |
| C | 6.657231  | 6.429322  | 7.809342 |

|   |           |           |           |
|---|-----------|-----------|-----------|
| C | 7.738806  | 5.843763  | 7.081471  |
| C | 7.729351  | 5.836085  | 5.680856  |
| C | 8.913891  | 5.752018  | 4.954921  |
| C | 8.951809  | 5.672611  | 7.788454  |
| C | 10.156523 | 5.859771  | 7.069170  |
| C | 10.140450 | 5.899717  | 5.655041  |
| C | 11.264836 | 6.392391  | 4.941276  |
| C | 11.281988 | 6.351295  | 7.789581  |
| C | 12.215691 | 7.146768  | 7.082404  |
| C | 12.219615 | 7.148911  | 5.658527  |
| C | 12.920043 | 8.154761  | 4.940198  |
| C | 12.890942 | 8.169215  | 7.803115  |
| C | 13.264065 | 9.331971  | 7.077451  |
| C | 13.280660 | 9.323563  | 5.660265  |
| C | 13.283737 | 10.544557 | 4.946109  |
| C | 13.266842 | 10.562554 | 7.773084  |
| C | 12.906862 | 11.728190 | 7.045891  |
| C | 12.896945 | 11.714529 | 5.650505  |
| C | 12.116940 | 12.672941 | 4.933812  |
| C | 12.158069 | 12.720427 | 7.752759  |
| C | 11.061279 | 13.298873 | 7.049969  |
| C | 11.049601 | 13.286513 | 5.646078  |
| C | 9.840141  | 13.507460 | 4.945319  |
| C | 9.860672  | 13.486660 | 7.773659  |
| C | 8.638737  | 13.327774 | 7.076734  |
| C | 8.628129  | 13.347030 | 5.662339  |
| C | 7.515193  | 12.833896 | 4.943333  |
| C | 7.534742  | 12.803531 | 7.804394  |
| C | 6.607437  | 12.006265 | 7.083471  |
| C | 6.610398  | 12.010655 | 5.659973  |
| C | 5.975197  | 10.968364 | 4.942202  |
| O | 5.489657  | 5.072413  | 3.504483  |
| O | 5.494154  | 5.079922  | 4.976442  |
| C | 12.710235 | 8.272018  | 12.052568 |
| C | 13.056495 | 9.439530  | 11.343147 |
| C | 13.170049 | 9.388068  | 9.929377  |
| C | 13.242717 | 10.583474 | 9.185814  |
| C | 13.015115 | 10.686907 | 12.041169 |
| C | 12.976722 | 11.850618 | 11.252406 |
| C | 12.960192 | 11.793675 | 9.865016  |
| C | 12.208698 | 12.779135 | 9.135638  |
| C | 12.523917 | 13.151997 | 11.789493 |
| C | 11.157788 | 13.339562 | 11.265154 |
| C | 11.113446 | 13.341983 | 9.864008  |
| C | 9.882596  | 13.457912 | 9.190187  |
| C | 10.018458 | 13.203401 | 12.047703 |
| C | 8.775356  | 13.104095 | 11.350517 |
| C | 8.707116  | 13.225211 | 9.937393  |
| C | 7.561657  | 12.761591 | 9.222592  |
| C | 7.648668  | 12.624422 | 12.055428 |
| C | 6.649326  | 11.929684 | 11.342344 |
| C | 6.629133  | 11.962744 | 9.924391  |
| C | 5.915533  | 10.973031 | 9.203312  |
| C | 5.908581  | 10.952877 | 12.053596 |
| C | 5.512002  | 9.796382  | 11.331891 |
| C | 5.529886  | 9.802931  | 9.915917  |
| C | 5.536288  | 8.580530  | 9.204110  |
| C | 5.502476  | 8.572888  | 12.047531 |

|   |           |           |           |
|---|-----------|-----------|-----------|
| C | 5.897252  | 7.413475  | 11.332224 |
| C | 5.902041  | 7.415266  | 9.923008  |
| C | 6.669284  | 6.447581  | 9.203972  |
| C | 6.671699  | 6.457187  | 12.054312 |
| C | 7.739987  | 5.846784  | 11.335153 |
| C | 7.744175  | 5.847153  | 9.922941  |
| C | 8.949368  | 5.651902  | 9.207016  |
| C | 8.943541  | 5.629134  | 12.048069 |
| C | 10.157310 | 5.800992  | 11.332580 |
| C | 10.163314 | 5.814187  | 9.918601  |
| C | 11.273706 | 6.343010  | 9.205485  |
| C | 11.252935 | 6.345868  | 12.050820 |
| C | 12.136032 | 7.188890  | 11.340061 |
| C | 12.171494 | 7.170178  | 9.925000  |
| C | 12.850588 | 8.193414  | 9.218806  |
| C | 12.784560 | 8.247143  | 16.300500 |
| C | 13.068877 | 9.448039  | 15.599083 |
| C | 12.908544 | 9.511543  | 14.161920 |
| C | 12.822057 | 10.714957 | 13.447719 |
| C | 13.295160 | 10.610246 | 16.326522 |
| C | 13.018235 | 11.880162 | 15.642698 |
| C | 12.547977 | 11.956989 | 14.234073 |
| C | 12.158031 | 12.724393 | 16.442956 |
| C | 11.074668 | 13.131866 | 15.666427 |
| C | 11.218799 | 12.781055 | 14.303141 |
| C | 10.082162 | 13.030178 | 13.491109 |
| C | 9.873948  | 13.429311 | 16.329323 |
| C | 8.707024  | 13.179126 | 15.588570 |
| C | 8.813304  | 13.046229 | 14.183888 |
| C | 7.660007  | 12.625852 | 13.467067 |
| C | 7.556577  | 12.746280 | 16.300912 |
| C | 6.622055  | 11.956008 | 15.596088 |
| C | 6.651252  | 11.932615 | 14.179281 |
| C | 5.909737  | 10.954959 | 13.465390 |
| C | 5.909341  | 10.966821 | 16.316554 |
| C | 5.523493  | 9.798785  | 15.601008 |
| C | 5.510834  | 9.796830  | 14.184577 |
| C | 5.501793  | 8.573415  | 13.467058 |
| C | 5.528682  | 8.575710  | 16.312512 |
| C | 5.894803  | 7.410749  | 15.591956 |
| C | 5.894068  | 7.412613  | 14.181911 |
| C | 6.670322  | 6.457028  | 13.459581 |
| C | 6.659297  | 6.440570  | 16.311657 |
| C | 7.735744  | 5.841937  | 15.591922 |
| C | 7.736165  | 5.844792  | 14.179078 |
| C | 8.941360  | 5.629301  | 13.466975 |
| C | 8.940907  | 5.650885  | 16.309175 |
| C | 10.151981 | 5.820581  | 15.597071 |
| C | 10.152486 | 5.806506  | 14.183437 |
| C | 11.248950 | 6.353796  | 13.466798 |
| C | 11.252936 | 6.368370  | 16.311075 |
| C | 12.126244 | 7.211302  | 15.594296 |
| C | 12.113140 | 7.217368  | 14.176946 |
| C | 12.683619 | 8.296076  | 13.459842 |
| O | 13.153658 | 13.943661 | 12.456675 |
| O | 13.770259 | 12.595181 | 14.654511 |

**Table S19. Coordinates in Å of 2O@MV (carbonyl and epoxy groups) and O<sub>2</sub>+(6,6) SWCNT**  
*E* = -6616.0992 Ha

|                                             |           |           |           |
|---------------------------------------------|-----------|-----------|-----------|
| 171                                         |           |           |           |
| O2+2O+(6,6)SWCNT cell=[19.2, 19.2, 17.2287] |           |           |           |
| C                                           | 5.628423  | 8.660815  | 0.556500  |
| C                                           | 5.609262  | 10.071398 | 0.553119  |
| C                                           | 6.926415  | 12.523235 | 0.572765  |
| C                                           | 8.109758  | 13.298254 | 0.587385  |
| C                                           | 10.888281 | 13.552824 | 0.589420  |
| C                                           | 7.058368  | 6.275294  | 0.621404  |
| C                                           | 12.161097 | 12.922008 | 0.590748  |
| C                                           | 13.515473 | 10.510458 | 0.641381  |
| C                                           | 13.517741 | 9.096277  | 0.658035  |
| C                                           | 8.303907  | 5.614346  | 0.657894  |
| C                                           | 12.242219 | 6.616122  | 0.675591  |
| C                                           | 11.074230 | 5.813328  | 0.677694  |
| C                                           | 5.782631  | 7.995365  | 1.798882  |
| C                                           | 5.746967  | 10.774362 | 1.789745  |
| C                                           | 6.435330  | 12.011419 | 1.801155  |
| C                                           | 6.515091  | 6.786493  | 1.826401  |
| C                                           | 8.790735  | 13.500613 | 1.822745  |
| C                                           | 10.200032 | 13.633028 | 1.835995  |
| C                                           | 12.702245 | 12.468373 | 1.810947  |
| C                                           | 13.327916 | 11.227323 | 1.856790  |
| C                                           | 13.320332 | 8.424311  | 1.896824  |
| C                                           | 12.678243 | 7.166610  | 1.908275  |
| C                                           | 8.973780  | 5.493223  | 1.901672  |
| C                                           | 10.383395 | 5.594852  | 1.913589  |
| C                                           | 12.644305 | 12.395771 | 16.602873 |
| C                                           | 6.464564  | 11.995142 | 16.562243 |
| C                                           | 10.227479 | 5.816583  | 6.857073  |
| C                                           | 8.823337  | 5.693572  | 6.864017  |
| C                                           | 6.300680  | 6.762979  | 6.685719  |
| C                                           | 5.595018  | 7.995285  | 6.693026  |
| C                                           | 5.749232  | 10.786069 | 6.724817  |
| C                                           | 6.448630  | 12.017228 | 6.730664  |
| C                                           | 8.800816  | 13.517096 | 6.740008  |
| C                                           | 10.212842 | 13.623928 | 6.755556  |
| C                                           | 13.562697 | 10.536467 | 5.558020  |
| C                                           | 13.513715 | 9.122798  | 5.572084  |
| C                                           | 8.767781  | 13.559388 | 16.590001 |
| C                                           | 12.137684 | 6.704021  | 5.607092  |
| C                                           | 10.939830 | 5.953201  | 5.626935  |
| C                                           | 8.180532  | 5.719503  | 5.588952  |
| C                                           | 6.911241  | 6.323262  | 5.501782  |
| C                                           | 5.479274  | 8.694775  | 5.481356  |
| C                                           | 5.526531  | 10.114402 | 5.488917  |
| C                                           | 6.936893  | 12.521889 | 5.499435  |
| C                                           | 8.136888  | 13.267637 | 5.506185  |
| C                                           | 10.929022 | 13.476719 | 5.536953  |
| C                                           | 12.210793 | 12.937532 | 5.583076  |
| C                                           | 10.184250 | 13.677244 | 16.602613 |
| C                                           | 12.966675 | 12.634840 | 4.341499  |
| C                                           | 13.413632 | 11.220761 | 4.336408  |
| C                                           | 13.310232 | 8.440756  | 4.352808  |
| C                                           | 12.642280 | 7.191400  | 4.369436  |

|   |           |           |           |   |           |           |           |
|---|-----------|-----------|-----------|---|-----------|-----------|-----------|
| C | 10.315090 | 5.666922  | 4.385132  | C | 12.123320 | 12.863179 | 12.927046 |
| C | 8.910673  | 5.550993  | 4.371840  | C | 12.649608 | 12.380513 | 11.705048 |
| C | 6.440193  | 6.810151  | 4.262533  | C | 10.434857 | 5.557065  | 16.671778 |
| C | 5.704753  | 8.012733  | 4.248504  | C | 13.390832 | 11.175840 | 11.717031 |
| C | 5.722261  | 10.790046 | 4.259311  | C | 13.447935 | 8.393870  | 11.721134 |
| C | 6.436376  | 12.011692 | 4.265255  | C | 12.751829 | 7.159869  | 11.726647 |
| C | 13.545564 | 10.482069 | 15.405336 | C | 10.395375 | 5.727735  | 11.742689 |
| C | 8.813085  | 13.473027 | 4.276872  | C | 8.998007  | 5.687812  | 11.787404 |
| C | 10.224831 | 13.589826 | 4.275061  | C | 6.800516  | 6.534263  | 11.544862 |
| C | 13.496585 | 10.540668 | 3.119484  | C | 6.128420  | 7.883566  | 11.573345 |
| C | 13.474598 | 9.124555  | 3.120088  | C | 5.951872  | 10.694821 | 11.637684 |
| C | 12.188622 | 6.650011  | 3.145996  | C | 6.519567  | 11.987411 | 11.651244 |
| C | 11.017256 | 5.855645  | 3.153633  | C | 8.777223  | 13.591205 | 11.665266 |
| C | 8.251717  | 5.658497  | 3.116240  | C | 9.015864  | 5.436444  | 16.665788 |
| C | 6.999397  | 6.313057  | 3.063614  | C | 10.187890 | 13.678399 | 11.678638 |
| C | 5.551415  | 8.689948  | 3.016877  | C | 13.606713 | 10.507768 | 10.488102 |
| C | 5.543277  | 10.104553 | 3.019189  | C | 13.625936 | 9.092448  | 10.494127 |
| C | 13.568761 | 9.071324  | 15.422069 | C | 12.208110 | 6.714966  | 10.492304 |
| C | 6.921783  | 12.521186 | 3.036863  | C | 10.966078 | 6.045296  | 10.505178 |
| C | 8.129465  | 13.264256 | 3.048246  | C | 8.128158  | 6.082399  | 10.730266 |
| C | 10.900485 | 13.543712 | 3.054301  | C | 5.807451  | 8.602354  | 10.386969 |
| C | 12.345350 | 13.206958 | 3.050065  | C | 5.782565  | 10.022310 | 10.410517 |
| C | 12.288839 | 6.597088  | 15.435172 | C | 6.953523  | 12.542570 | 10.423207 |
| C | 11.119820 | 5.797534  | 15.439156 | C | 8.114682  | 13.347541 | 10.431789 |
| C | 8.331563  | 5.529429  | 15.442685 | C | 6.563736  | 6.735828  | 16.606604 |
| C | 7.074928  | 6.191944  | 15.403990 | C | 10.885338 | 13.524868 | 10.455823 |
| C | 5.721747  | 8.617415  | 15.318729 | C | 12.140796 | 12.872590 | 10.475439 |
| C | 13.352142 | 11.175038 | 16.628409 | C | 12.672172 | 12.396523 | 9.254538  |
| C | 5.701930  | 10.027711 | 15.318139 | C | 13.419800 | 11.199210 | 9.259968  |
| C | 6.942993  | 12.519907 | 15.338958 | C | 13.422724 | 8.430240  | 9.256782  |
| C | 8.102858  | 13.332591 | 15.356044 | C | 12.673514 | 7.235278  | 9.267837  |
| C | 10.874052 | 13.532513 | 15.368029 | C | 10.164474 | 5.941486  | 9.337020  |
| C | 12.119069 | 12.869902 | 15.373694 | C | 8.712228  | 5.933586  | 9.410669  |
| C | 12.633386 | 12.373375 | 14.155241 | C | 5.813180  | 6.527966  | 9.009840  |
| C | 13.364636 | 11.162424 | 14.172015 | C | 5.658506  | 7.971741  | 9.141653  |
| C | 13.428599 | 8.378476  | 14.191251 | C | 5.853019  | 7.956481  | 16.564956 |
| C | 12.772476 | 7.122012  | 14.197357 | C | 5.850276  | 10.742706 | 9.190012  |
| C | 10.468098 | 5.559216  | 14.205583 | C | 6.479697  | 12.011038 | 9.195130  |
| C | 13.383003 | 8.394265  | 16.664157 | C | 8.787505  | 13.559374 | 9.201998  |
| C | 9.056245  | 5.400824  | 14.215910 | C | 10.195335 | 13.657747 | 9.219604  |
| C | 6.563512  | 6.657713  | 14.170417 | C | 13.621783 | 10.532250 | 8.019100  |
| C | 5.966718  | 7.904725  | 14.100563 | C | 13.595774 | 9.113925  | 8.027006  |
| C | 5.904734  | 10.687354 | 14.078445 | C | 12.108500 | 6.754976  | 8.063584  |
| C | 6.505527  | 11.968120 | 14.100053 | C | 10.860597 | 6.083198  | 8.094174  |
| C | 8.770089  | 13.586530 | 14.128377 | C | 8.069368  | 5.874495  | 8.087636  |
| C | 10.181224 | 13.680722 | 14.138927 | C | 6.743209  | 6.246687  | 7.917197  |
| C | 13.575093 | 10.485160 | 12.948671 | C | 5.813147  | 10.737548 | 16.546319 |
| C | 13.610124 | 9.070502  | 12.959042 | C | 5.514665  | 8.684878  | 7.944209  |
| C | 12.295189 | 6.614273  | 12.960983 | C | 5.610734  | 10.092925 | 7.953655  |
| C | 12.735163 | 7.133947  | 16.672116 | C | 6.937072  | 12.536698 | 7.960687  |
| C | 11.108713 | 5.837740  | 12.968929 | C | 8.122728  | 13.311464 | 7.964966  |
| C | 8.377041  | 5.534231  | 13.024273 | C | 10.896797 | 13.512068 | 7.994665  |
| C | 7.019026  | 6.012555  | 12.947415 | C | 12.163111 | 12.888541 | 8.021491  |
| C | 5.896402  | 8.550492  | 12.810362 | C | 12.716134 | 12.442662 | 6.801938  |
| C | 5.814185  | 9.976448  | 12.844611 | C | 13.447739 | 11.223450 | 6.802026  |
| C | 6.963117  | 12.527337 | 12.881740 | C | 13.354699 | 8.439672  | 6.807832  |
| C | 8.108824  | 13.355352 | 12.894861 | C | 12.621955 | 7.228652  | 6.825648  |
| C | 10.876279 | 13.528140 | 12.913753 | O | 5.244164  | 5.661065  | 9.650585  |

O 6.075437 5.420973 12.041507  
O 13.231197 14.363003 3.210969  
O 14.044795 13.612697 4.183458

## ■ AUTHOR INFORMATION

### Corresponding Authors

paola.ayala@univie.ac.at, thomas.pichler@univie.ac.at

---

## ■ REFERENCES

- (S1) Hersam, M. *Nat. Nanotechnol.* **2008**, *3*, 387.  
(S2) Yanagi, K.; Udoguchi, H.; Sagitani, S.; Oshima, Y.; Takenobu, T.; Kataura, H.; Ishida, T.; Matsuda, K.; Maniwa, Y. *ACS Nano* **2010**, *4*, 4027.  
(S3) Miyata, Y.; Yanagi, K.; Maniwa, Y.; Kataura, H. *J. Phys. Chem. C* **2008**, *112*, 13187–13191.  
(S4) Ayala, P.; Miyata, Y.; De Blauwe, K.; Shiozawa, H.; Feng, Y.; Yanagi, K.; Kramberger, C.; Silva, S.; Follath, R.; Kataura, H.; Pichler, T. *Phys. Rev. B* **2009**, *80*, 205427.  
(S5) Rauf, H.; Pichler, T.; Knupfer, M.; Fink, J.; Kataura, H. *Phys. Rev. Lett.* **2004**, *93*, 096805.  
(S6) Kramberger, C.; Rauf, H.; Shiozawa, H.; Knupfer, M.; Buchner, B.; Pichler, T.; Batchelor, D.; Kataura, H. *Phys. Rev. B* **2007**, *75*, 235437.  
(S7) De Blauwe, K.; Mowbray, D. J.; Miyata, Y.; Ayala, P.; Shiozawa, H.; Rubio, A.; Hoffmann, P.; Kataura, H.; Pichler, T. *Phys. Rev. B* **2010**, *82*, 125444.  
(S8) Starr, D. E.; Pan, D.; Newberg, J. T.; Ammann, M.; Wang, E. G.; Michaelides, A.; Bluhm, H. *Phys. Chem. Chem. Phys.* **2011**, *13*, 19988.  
(S9) Perdew, J. P.; Zunger, A. *Phys. Rev. B* **1981**, *23*, 5048.
